# Supplementary material for: Biodegradable betaine-based aprotic task-specific ionic liquids and their application in efficient SO2 absorption
Source: Royal Society of Chemistry journal article supplement (doi:10.1039/c5gc00691k), 2015-01-01
Supplement: c5gc00691k1.pdf [file c5gc00691k1.pdf]

## Supplementary Information

### **Biodegradable betaine-based aprotic task-specific ionic liquids and their application in efficient SO<sub>2</sub> absorption**

Benqun Yang,<sup>a,b</sup> Qinghua Zhang,<sup>a</sup> Yuqing Fei,<sup>a</sup> Feng Zhou,<sup>a</sup> Peixue Wang,<sup>a</sup> and Youquan Deng<sup>\*,a</sup>

<sup>a</sup>Centre for Green Chemistry and Catalysis, State Key Laboratory of Solid Lubrication, Lanzhou

Institute of Chemical Physics, Chinese Academy of Sciences, Lanzhou 730000, China.

<sup>b</sup>University of Chinese Academy of Sciences, Beijing 100039, China.

\*Email: [y deng@licp.cas.cn](mailto:y deng@licp.cas.cn)

## Experimental Section

### Details on synthesis and characterization of betaine-based ILs

**Chemicals.** All reagents and solvents were pure analytical grade materials purchased from commercial sources and were used without further purification, if not stated otherwise.

#### Synthetic details of the ILs:

##### Synthesis of [C<sub>4</sub>bet][Br], [1O2][Br] and [2O2][Br]

Take the synthesis of [C<sub>4</sub>bet][Br] as an example:

A mixture of betaine (35.145g, 0.30 mol) and 1-bromobutane (49.33g, 0.36 mol) in acetonitrile (100 mL) was vigorously stirred at 100°C for 24 h. After removal of the volatile components, the mixtures were washed with the absolute ethyl ether for three times to remove the unreacted 1-bromobutane. Then, the mixtures were dissolved in acetonitrile and filtration to remove the unreacted betaine. After evaporation under vacuum at 80°C, [C<sub>4</sub>bet][Br] was obtained as a white solid.

##### Synthesis of [C<sub>4</sub>bet][TFSI], [[1O2]][TFSI] and [2O2][TFSI]

Take the synthesis of [C<sub>4</sub>bet][TFSI] as an example:

To a solution of the obtained [C<sub>4</sub>bet][Br] (0.1 mol) in deionized water, the aqueous solution containing the LiNTf<sub>2</sub> (0.12 mol) was added under vigorous stirring at room temperature for 6 hours. The crude solid precipitates was separated from water, followed by thorough washing with deionized water until no residual bromine ion in the washed water detected by a Mettler–Toledo Seven Multi meter with a bromine ion selective electrode. The final product was dried under high vacuum at 100°C, and then stored in a desiccator under dry nitrogen.

##### Synthesis of [C<sub>4</sub>bet][DCA], [[1O2]][DCA] and [2O2][DCA]

Take the synthesis of [C<sub>4</sub>bet][DCA] as an example:

To a solution of the obtained [C<sub>4</sub>bet][Br] (0.1 mol) in deionized water, the silver dicyanamide (0.12 mol) was added under vigorous stirring at room temperature for 12 h. After the reaction was finished, the crude liquid was extracted from water by adding CH<sub>2</sub>Cl<sub>2</sub>, and the combined extracts were washed with the deionized water until no residual bromine ion in the washed water detected by a Mettler–Toledo Seven Multi meter with a bromine ion selective electrode. The final product was dried under high vacuum at 80°C, and then stored in a desiccator under dry nitrogen.

### **Synthesis of [C<sub>4</sub>bet][SCN]**

To a solution of the obtained [C<sub>4</sub>bet][Br] (0.1 mol) in deionized water, the aqueous solution containing the KPF<sub>6</sub> (0.12 mol) was added under vigorous stirring at room temperature for 6 hours. The crude solid precipitates was separated from water, followed by thorough washing with deionized water until no residual bromine ion in the washed water detected by a Mettler–Toledo Seven Multi meter with a bromine ion selective electrode. Then, to a solution of the obtained [C<sub>4</sub>bet][PF<sub>6</sub>] in CH<sub>2</sub>Cl<sub>2</sub>, the aqueous solution containing the KSCN (0.12 mol) was added under vigorous stirring at room temperature for 24 h. After removal of the CH<sub>2</sub>Cl<sub>2</sub> and water, the mixtures were dissolved in CH<sub>2</sub>Cl<sub>2</sub> and filtration to remove the KPF<sub>6</sub> and excessive KSCN. The collected mixtures were then dissolved in deionized water and washed with CH<sub>2</sub>Cl<sub>2</sub> for three times to remove the unreacted [C<sub>4</sub>bet][PF<sub>6</sub>]. The final product was dried under high vacuum at 80°C, and then stored in a desiccator under dry nitrogen.

### **NMR and FT-IR**

<sup>1</sup>H and <sup>13</sup>C NMR Spectra were measured by a Bruker AMX FT 400 MHz NMR spectrometer in the D<sub>6</sub>-acetone solutions. Chemical shifts were reported downfield in parts per million (ppm, δ) from a tetramethylsilane reference. FT-IR spectra was recorded on a Thermo Nicolet 5700 FT-IR spectrophotometer.

### **Water content and content of the bromine ion**

The water content in ILs was detected by means of a coulometric Karl–Fischer titration using a Mitsubishi CA-06 Moisturemeter, and each test was conducted in an anhydrous sealed chamber and was finished within 1 min. Duplicate measurements were performed on each sample with results agreeing to within 5%. Before the water content test, each sample were kept at 80°C and 10<sup>-2</sup>-10<sup>-3</sup> mbar for 12 h, except for the ILs based on the [TFSI] anion, which were dried at 100°C. The content of bromide ion was determined by a Mettler–Toledo Seven Multi meter with a Br<sup>-</sup> selective electrode.

### **Phase transitions and thermal stability**

The DSC data were evaluated by using the Mettler–Toledo STARe software version 7.01. The samples were sealed in 40 μL aluminum pan and a pinhole at the top of the pan for the sake of the sample exposing to a flowing N<sub>2</sub> (50 mL min<sup>-1</sup>) atmosphere using an empty pan as the reference.

DSC traces were typically scanned from 100 to -100 °C at speed of 10 °C min<sup>-1</sup>, and then followed the heating process at the same speed.

The decomposition temperature ( $T_d$ ) was recorded with 5% of mass loss by Pyris Diamond Perkin-Elmer TG/DTA at scan rate of 10 °C min<sup>-1</sup> under a N<sub>2</sub> atmosphere (flow rate = 100 mL min<sup>-1</sup>) and each ILs was heated from room temperature to 800 °C.

#### **Viscosity, density, conductivity and electrochemical stability**

The viscosity of each ILs were measured on a Stabinger Viscosimeter SVM 3000/GR. The density was determined using a volume–mass method in a 10 mL volumetric flask calibrated with water. The ion conductivity was measured by a Mettler–Toledo Seven Multi meter. Cyclic voltammetry was conducted using a CHI 660A Electrochemical Work Station. The working electrode was a glassy carbon electrode (3 mm diameter), the auxiliary electrode was a platinum wire and a Ag/AgCl electrode was used as a reference.

#### **NMR data of 1-Bromobutane and betaine-based ILs**

**1-Bromobutane:** <sup>1</sup>H NMR (Acetone-d<sub>6</sub>): 0.94(t, 3H), 1.45(m, 2H), 1.83(m, 2H), 3.49(t, 2H); <sup>13</sup>C NMR (Acetone-d<sub>6</sub>): 12.50, 20.99, 33.51, 34.70.

**[C<sub>4</sub>bet][TFSI]:** <sup>1</sup>H NMR (Acetone-d<sub>6</sub>): 0.90(t, 3H), 1.37(m, 2H), 1.65(m, 2H), 3.53(s, 9H), 4.25(t, 2H), 4.57(s, 2H); <sup>13</sup>C NMR (Acetone-d<sub>6</sub>): 18.11, 23.87, 35.32, 59.27, 68.58, 71.39, 120.53, 123.73, 126.92, 130.11, 169.85.

**[C<sub>4</sub>bet][DCA]:** <sup>1</sup>H NMR (Acetone-d<sub>6</sub>): 0.91(t, 3H), 1.37(m, 2H), 1.65(m, 2H), 3.50(s, 9H), 4.25(t, 2H), 4.61(s, 2H); <sup>13</sup>C NMR (Acetone-d<sub>6</sub>): 18.22, 23.92, 35.37, 58.83, 68.35, 71.13, 124.96, 170.06.

**[C<sub>4</sub>bet][SCN]:** <sup>1</sup>H NMR (Acetone-d<sub>6</sub>): 0.93(t, 3H), 1.40(m, 2H), 1.65(m, 2H), 3.59(s, 9H), 4.27(t, 2H), 4.76(s, 2H); <sup>13</sup>C NMR (Acetone-d<sub>6</sub>): 13.05, 18.73, 30.20, 53.54, 63.04, 65.86, 131.69, 165.12.

**[C<sub>4</sub>bet][SCN]-SO<sub>2</sub>:** <sup>1</sup>H NMR (Acetone-d<sub>6</sub>): 0.93(t, 3H), 1.40(m, 2H), 1.66(m, 2H), 3.59(s, 9H), 4.27(t, 2H), 4.76(s, 2H); <sup>13</sup>C NMR (Acetone-d<sub>6</sub>): 13.06, 18.74, 30.20, 53.56, 63.05, 65.88, 130.62, 165.01.

**[C<sub>4</sub>bet][SCN] with 5.1% water after SO<sub>2</sub> desorption:** <sup>1</sup>H NMR (Acetone-d<sub>6</sub>): 0.93(t, 3H), 1.40(m, 2H), 1.66(m, 2H), 3.59(s, 9H), 4.27(t, 2H), 4.76(s, 2H); <sup>13</sup>C NMR (Acetone-d<sub>6</sub>): 13.06, 18.74, 30.19, 53.54, 63.02, 65.86, 131.58, 165.02.

**[1O2bet][TFSI]:** <sup>1</sup>H NMR (Acetone-d<sub>6</sub>): 3.30(s, 3H), 3.53(s, 9H), 3.60(t, 2H), 4.37(s, 2H), 4.58(s, 2H); <sup>13</sup>C NMR (Acetone-d<sub>6</sub>): 59.12, 63.04, 68.68, 70.34, 74.69, 120.53, 123.72, 126.92, 130.11,

169.72.

**[1O2bet][DCA]:**  $^1\text{H}$  NMR (Acetone- $d_6$ ): 3.33(s, 3H), 3.53(s, 9H), 3.64(t, 2H), 4.40(s, 2H), 4.63(s, 2H);  $^{13}\text{C}$  NMR (Acetone- $d_6$ ): 53.68, 57.94, 63.25, 65.14, 69.55, 119.75, 164.72.

**[2O2bet][TFSI]:**  $^1\text{H}$  NMR (Acetone- $d_6$ ): 1.11(t, 3H), 3.47(m, 2H), 3.54(s, 9H), 3.65(t, 2H), 4.37(t, 2H), 4.58(s, 2H);  $^{13}\text{C}$  NMR (Acetone- $d_6$ ): 19.71, 59.13, 68.74, 70.58, 71.12, 72.65, 120.53, 123.73, 126.92, 130.11, 169.71.

**[2O2bet][DCA]:**  $^1\text{H}$  NMR (Acetone- $d_6$ ): 1.11(t, 3H), 3.46(m, 2H), 3.51(s, 9H), 3.65(t, 2H), 4.37(t, 2H), 4.62(s, 2H).  $^{13}\text{C}$  NMR (Acetone- $d_6$ ): 19.81, 58.90, 68.50, 70.54, 71.16, 72.70, 124.97, 169.92.

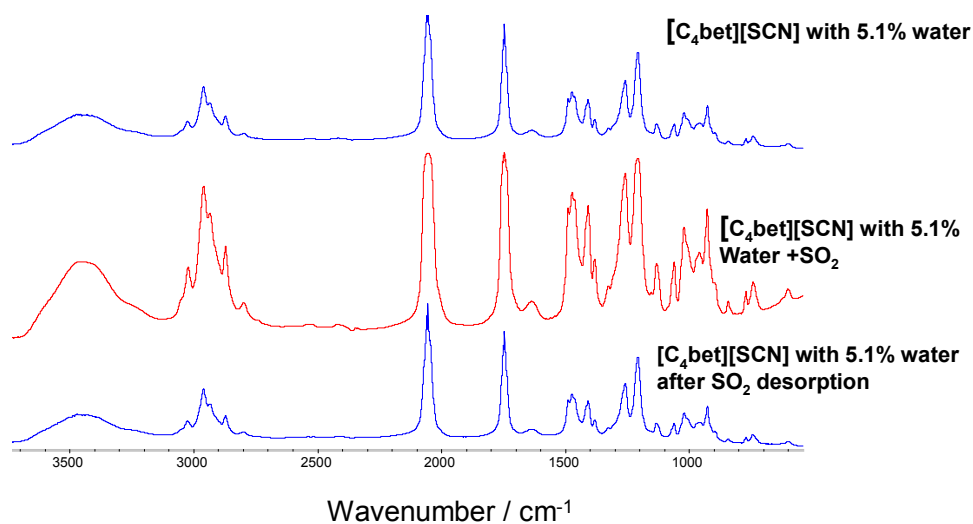

**Fig. S1** FT-IR spectra of [C<sub>4</sub>bet][SCN] with 5.1% water before and after absorption of SO<sub>2</sub>.
